# Supplementary material
Source: PubMed Central journal article supplement (PMC5856477)
Supplement: NIHMS919619-supplement.pdf [file NIHMS919619-supplement.pdf]

## Neuroimaging Mechanisms of Therapeutic Transcranial Magnetic Stimulation for Major Depressive Disorder

### *Supplemental Information*

#### Search terms

For this review, we searched PubMed (searches performed between 5/15/2017-6/30/2017). Stimulation search terms included repetitive transcranial magnetic stimulation, accelerated TMS, and theta burst stimulation. Imaging search terms included PET and SPECT, and magnetic resonance imaging resting state functional connectivity. All searches used the whole terms, their constituents and associated abbreviations. Additional searches were made from recent imaging papers (e.g., Liston *et al.*(1)) and descriptions of highly impactful TMS studies (2). Search results were reviewed by NSP and JB.

1. Liston C, Chen AC, Zebley BD, Drysdale AT, Gordon R, Leutcher B, *et al.* (2014): Default mode network mechanisms of transcranial magnetic stimulation. *Biol Psychiatry* 76(7):517–526.
2. Ziemann U. Thirty years of transcranial magnetic stimulation: where do we stand? *Exp Brain Res.* 2017 Apr;235(4):973-984.

| Table S1. Data Analyses in Prospective Resting State Imaging Studies of TMS |                                                                                      |                                                                                                   |                          |                   |                      |                                                             |                                                   |     |
|-----------------------------------------------------------------------------|--------------------------------------------------------------------------------------|---------------------------------------------------------------------------------------------------|--------------------------|-------------------|----------------------|-------------------------------------------------------------|---------------------------------------------------|-----|
| Study                                                                       | Contrast Sample Size ( <i>n</i> )                                                    | Motion Confound Adjustment <sup>a</sup>                                                           | Global Signal Regression | Tissue Regression | Bandpass Filter (Hz) | Statistical Thresholds ( <i>p</i> -value)                   | Multiple Comparisons Correction (Program/Toolbox) | CV  |
| Baeken <i>et al.</i> , 2014 (62)                                            | Group x time (20)<br>Responder (7) vs.<br>Nonresponder (13)                          | Standard realignment                                                                              | Yes                      | CSF, WM           | 0.01-0.08            | Voxel height (<.05)<br>Cluster size (<.05)                  | FWE<br>(AlphaSim/AFNI)                            | No  |
| Downar <i>et al.</i> , 2014 (72)                                            | Responder (24) vs.<br>Nonresponder (23)                                              | Standard realignment                                                                              | No                       | CSF, WM           | 0.009-0.09           | ROI-to-ROI Monte Carlo<br>permutation (<.05)                | Bonferroni-correction,<br>515 cross-correlations  | No  |
| Liston <i>et al.</i> , 2014 (63)                                            | MDD (17) vs. HC (35)<br>Strong (9) vs. Weak (8)<br>response                          | Standard realignment,<br>RMS motion regression                                                    | No                       | CSF, WM           | 0.005-0.1            | Voxel height (<.005 or <.05)<br>Cluster size (<.05 or >.01) | FWE<br>(AlphaSim/AFNI)                            | No  |
| Salomons <i>et al.</i> , 2014 (74)                                          | Pre-treatment RSFC (25)<br>Pre vs. Post RSFC (25)                                    | Standard realignment,<br>Post hoc correlation of<br>motion and RSFC<br>change                     | No                       | CSF, WM           | 0.009-0.09           | Cluster size (<.05)                                         | FWE<br>(FLAME/FSL)                                | No  |
| Kang <i>et al.</i> , 2016 (68)                                              | Active (12) vs. Sham (9)                                                             | Standard realignment                                                                              | No                       | CSF, WM           | 0.01-0.08            | Voxel height (<.001)<br>Cluster size (<.05)                 | FWE<br>(AlphaSim/AFNI)                            | Yes |
| Baeken <i>et al.</i> , 2017 (65)                                            | MDD (44) vs. HC (44)<br>Group x time (25)<br>Responder (20) vs.<br>Nonresponder (18) | Standard realignment,<br>Motion censoring                                                         | Yes                      | CSF, WM           | 0.008-0.1            | Voxel height (<.005 or <.05)<br>Cluster size (<.05 or <.01) | FWE<br>(GLMflex/SPM)                              | No  |
| Ge <i>et al.</i> , 2017 (70)                                                | HC ICA (21)<br>MDD ICA (18)<br>R (11) vs. NR (7)                                     | Mean FD regression                                                                                | No                       | No                | No                   | Voxel height (<.05)<br>Cluster size (<.001)                 | FWE<br>(AlphaSim/AFNI)                            | No  |
| Avissar <i>et al.</i> , 2017 (71)                                           | MDD (27) vs. HC (27)<br>Responder (15) vs.<br>Nonresponder (12)                      | Standard realignment                                                                              | No                       | CSF, WM           | 0.005-0.1            | Voxel height (<.01)<br>Cluster size (<.01)                  | FWE<br>(3dClustSim/AFNI)                          | No  |
| Philip <i>et al.</i> , 2017 (67)                                            | Pre vs. Post RSFC (25)<br>Responder (11) vs.<br>Nonresponder (22)                    | Standard realignment +<br>1 <sup>st</sup> temporal derivative                                     | No                       | aCompCor          | 0.01-0.1             | Voxel height (<.005)<br>Cluster size (<.05)                 | FDR<br>(CONN)                                     | Yes |
| Taylor <i>et al.</i> <sup>b</sup>                                           | Time 1 vs. Time 1 (32)<br>Responder (12) vs.<br>Nonresponder (20)                    | 24 realignment<br>parameters,<br>Motion censoring,<br>Post hoc RSFC-motion<br>correlation testing | No                       | aCompCor          | 0.01-0.1             | Voxel height (<.001)<br>Cluster size (<.001)                | FWE<br>(SPM)                                      | No  |

Note: Some sample sizes differ from above reports due to usable MRI data.

Key: CV, statistical cross validation; CSF, cerebral spinal fluid; WM, white matter; FWE, family-wise error; AFNI, Analysis of Functional NeuroImages; ROI, region of interest; MDD, major depressive disorder; HC, healthy control; RMS, root mean squared; RSFC, resting-state functional connectivity; FLAME, FMRIB's Local Analysis of Mixed Effects; FSL, FMRIB Software Library; ICA, independent component analysis; FD, frame-wise displacement; SPM, statistical parametric mapping; aCompCor, anatomical component based noise correction; CONN, Conn: Functional Connectivity Toolbox.

<sup>a</sup> Standard realignment defined as 6 parameter regression

<sup>b</sup> personal communication
